# Supplementary material for: The Mitochondrial Response to DNA Damage
Source: Front Cell Dev Biol. 2021 May 12;9:669379. doi: 10.3389/fcell.2021.669379 (PMC8149749; doi:10.3389/fcell.2021.669379)
Supplement: Supplementary Table 1 — Enzymes/proteins in mtDNA repair. Important enzymes/proteins in mammalian mitochondria in different mtDNA damage repair mechanisms are present. Functions of each enzyme/protein are also listed. [file Table_1.xlsx]

## Sheet: Sheet1
mtDNA damage repair mechanism	Key enzymes and proteins in mammalian mitochondria	Function in mtDNA damage repair
Base excision repair (BER)	alkyladenine DNA glycosylase (AAG)	Mono-functional glycosylases
	MutY glycosylase homolog (MUTYH)	Mono-functional glycosylases
	uracil N-glycosyalse (UNG)	Mono-functional glycosylases
	8-oxoguanine DNA glycosylase-1 (OGG1)	Bi-functional DNA glycosylases
	Nei-like 1 (NEIL1)	Bi-functional DNA glycosylases
	Nei-like 2 (NEIL2)	Bi-functional DNA glycosylases
	Nth-Like 1 (NTHL1)	Bi-functional DNA glycosylases
	apurinic/apyrimidinic endonuclease 1 (APE1)	DNA end processing
	polynucleotide kinase/phosphatase (PNKP)	DNA end processing
	polymerase γ (Pol γ)	DNA end processing, gap filling
	flap endonuclease 1 (FEN1)	DNA end processing
	DNA replication helicase/nuclease 2 (DNA2)	DNA end processing
	5’-exo/endonuclease (EXOG)	DNA end processing
	DNA ligase III	DNA ligation
	poly-ADP-ribose polymerase 1 (PARP1)	unclear, possibly recognizing SSBs
	tyrosyl DNA phosphodiesterase 1 (TDP1)	DNA end processing
	aprataxin (APTX)	DNA end processing
Direct reversal	a protein with similar molecular weight to O6-methylguanine DNA methyltransferase (MGMT)	unclear, possibly repairing the O6-methylguanine lesions
Mismatch repair	Y-box binding protein 1 (YB-1)	base excision and mismatch repair
Double-strand break repair	Rad51	homologous recombination
	XRCC3	homologous recombination
	breast cancer type 1 susceptibility protein (BRCA1)	promoting homologous recombination
	p53-binding protein 1 (53BP1)	promoting non-homologous end joining
